# Supplementary material for: Prediction of endoplasmic reticulum resident proteins using fragmented amino acid composition and support vector machine
Source: PeerJ. 2017 Sep 4;5:e3561. doi: 10.7717/peerj.3561 (PMC5588793; doi:10.7717/peerj.3561)
Supplement: Table S1 [file peerj-05-3561-s001.xlsx]

## Sheet: Errp_id
Training Dataset
Positive Dataset					Negative Dataset
DJC10_HUMAN					AAAS_HUMAN
DPM1_HUMAN					1FEH_BROPI
ERP44_HUMAN					22P1_RAT
FKB10_HUMAN					2A5D_YEAST
HYOU1_HUMAN					2AAA_YEAST
MINP1_HUMAN					33VP_CHENC
MTP_HUMAN					3AT1_ARATH
NBEL2_HUMAN					3BP1_HUMAN
PDI_YEAST					3BP5H_DROME
SAHH2_HUMAN					3HIDH_HUMAN
SUMF1_HUMAN					41_DROME
TSP1_HUMAN					4CL4_ARATH
ABP1_MAIZE					4CLL9_ARATH
DNJC3_HUMAN					60A_DROME
GLU2B_HUMAN					6GAL_HYPRU
GRP78_YEAST					6P21_YEAST
MNL1_YEAST					6P22_YEAST
SCJ1_YEAST					A1LA_LOXAR
SIL1_YEAST					A2AP_BOVIN
TXD12_HUMAN					A2GL_HUMAN
ALG13_HUMAN					A2MG_BOVIN
ALG13_YEAST					AAE15_ARATH
BGL18_ARATH					AAE20_ARATH
CIPK6_ARATH					AAE_RAUSE
CNPY3_HUMAN					AAGAB_HUMAN
ERLEC_HUMAN					AAKG2_HUMAN
EST3_HUMAN					AATF_DROME
GGPP2_ARATH					AATF_HUMAN
MESD_HUMAN					AATM_YEAST
NB5R4_HUMAN					AB140_YEAST
P4HA3_HUMAN					AB17A_HUMAN
RCN1_HUMAN					ABC3A_HUMAN
SERPH_HUMAN					ABC3D_HUMAN
OFUT1_DROME					ABEC3_MOUSE
WBL_DROME					ABF2_CAEEL
GLU2A_YEAST					ABF2_YEAST
GLU2B_SCHPO					ABFA_ASPAW
PDI1_DICDI					ABIA_DICDI
TYW1_YEAST					ABLM1_MOUSE
UBX7_YEAST					ACADS_MOUSE
AAH_ARATH					ACEB_EMENI
BAG7_ARATH					ACINU_HUMAN
CALR1_ARATH					ACLY_HUMAN
CALR3_HUMAN					ACO15_HUMAN
DNJ36_ARATH					ACP1_HORVU
DNJ63_ARATH					ACPH_HUMAN
DNJB9_HUMAN					ACTB_DICDI
DNSL1_HUMAN					ACTNA_DICDI
EDEM3_HUMAN					ACY1_HUMAN
EMC2_YEAST					ADAT3_HUMAN
ENPL_ARATH					ADIRF_HUMAN
EOGT_HUMAN					ADRO_YEAST
ERP27_HUMAN					AF1L2_MOUSE
FAR3_YEAST					AFF1_HUMAN
FKB14_HUMAN					AFF2_HUMAN
FKBP7_HUMAN					AFF4_HUMAN
FXRD2_HUMAN					AFP4_MYOOC
GDL19_ARATH					AGALA_ASPNG
GLU2B_YEAST					AGAL_HUMAN
GT252_HUMAN					AGGF1_HUMAN
ILL4_ARATH					AGLU_CANTS
INP5K_HUMAN					AGSA_APLCA
KDEL2_HUMAN					AHR_CAEEL
KRE5_YEAST					AIM18_YEAST
LHS1_YEAST					AIMP2_MOUSE
MPD1_YEAST					AK1_ARATH
MPD2_YEAST					AKIR2_HUMAN
MSC7_YEAST					AL4A1_HUMAN
NAI2_ARATH					AL7A1_HUMAN
OS9_ARATH					ALF4_ARATH
P3H3_HUMAN					ALKR4_ARATH
P4H1_ARATH					ALL5_BLOTA
P4HA1_CAEEL					ALM1_SCHPO
PCY1B_HUMAN					ALPS_TACTR
PDIA5_HUMAN					ALR_HUMAN
SDF2L_HUMAN					ALS2_HUMAN
SDF2_ARATH					AMBP_HUMAN
SEP15_HUMAN					AMDL_CAEEL
SIL1_MOUSE					AMOL2_HUMAN
SPS1_ARATH					AMS2_SCHPO
TXND5_HUMAN					ANC2_MOUSE
UAH_ORYSJ					ANIS1_ANISI
UGGG_ARATH					ANM5_DROME
UGHY_ORYSJ					ANR26_MOUSE
A1ATR_HUMAN					ANTA_GENTR
ASPG1_ARATH					ANXA6_HUMAN
DJB11_MOUSE					AOXD_MOUSE
EPMIP_HUMAN					AP1AR_HUMAN
GLYL2_HUMAN					APBB3_HUMAN
KCNRG_HUMAN					APC1_HUMAN
MSRB3_MOUSE					APC2_YEAST
OREX_RAT					APE3_YEAST
PDIA2_MOUSE					API5_HUMAN
TOR2A_MOUSE					APN1_YEAST
UGGG_DROME					APOP1_MOUSE
ZFN2B_MOUSE					APTH1_YEAST
MU185_SCHPO					ARC1B_BOVIN
PEP12_SCHPO					ARFG_ARATH
UGGG_SCHPO					ARGR1_ARGRF
CYPD_YEAST					ARHGQ_HUMAN
EST1_CAEEL					ARI1A_HUMAN
TORS_CAEEL					ARI1B_HUMAN
YD056_YEAST					ARI1_HUMAN
CRUA_BRANA					ARI3A_MOUSE
HSP7R_ARATH					ARMC5_HUMAN
OS9_MOUSE					AROC_CAPSE
PSL5_ARATH					ARP5_SCHPO
RCN2_RAT					ARPC5_DICDI
YD476_YEAST					ARS_VOLCA
DDRGK_MOUSE					ASAP3_HUMAN
RUMI_DROME					ASB2_HUMAN
Y5025_DICDI					ASC_DANRE
CDC48_ENCCU					ASF1_YEAST
MUG31_SCHPO					ASH1L_HUMAN
OBP1_SCHPO					ASH2L_HUMAN
CNPY1_DANRE					ASHH2_ARATH
NBEL2_DANRE					ASNS1_YEAST
PDI_HORVU					AST2_YEAST
PDILT_RAT					ATB14_ARATH
SIL1_YARLI					ATG29_YEAST
MA2C1_RAT					ATH1_YEAST
P3H1_CHICK					ATP11_YEAST
FKBP2_NEUCR					ATS1_MOUSE
SEP2_EMIHU					ATX2_DROME
					AUXI_HUMAN
					AXLP1_CAEEL
					B4_XENLA
					BAG1_CAEEL
					BAM1_ARATH
					BAT41_CAEEL
					BBR_HORVU
					BCAS3_DROME
					BCKD_HUMAN
					BDC1_SCHPO
					BEM2_YEAST
					BGALA_PENSQ
					BGLC_EMENI
					BHE22_MOUSE
					BIM1_ARATH
					BIR7A_XENLA
					BL1S3_DROME
					BLH5_ARATH
					BLT1_SCHPO
					BMS1_SCHPO
					BNIPL_HUMAN
					BOP1_CHLRE
					BPC7_ARATH
					BQT1_SCHPO
					BRD7_HUMAN
					BRG1_CANAL
					BRR2_SCHPO
					BSU1_ARATH
					BTGE_EMENI
					BUBR1_ARATH
					BUD32_YEAST
					BYE1_YEAST
					C170B_HUMAN
					C1QT8_HUMAN
					C1TM_HUMAN
					C2CD3_HUMAN
					C3H33_ARATH
					CA112_HUMAN
					CABL1_MOUSE
					CAER4_XENBO
					CAH11_HUMAN
					CALD1_HUMAN
					CAN3_HUMAN
					CAO1_SCHPO
					CAR14_HUMAN
					CARP_IRPLA
					CASP6_HUMAN
					CAT8_YEAST
					CATT_YEAST
					CBF1_CANAL
					CBP1_AJECG
					CBPH_DICDI
					CBS_RAT
					CC124_HUMAN
					CC162_MOUSE
					CCA_SCHMA
					CCD39_CHLRE
					CCD82_HUMAN
					CCD_CROSA
					CCL24_HUMAN
					CCNB3_HUMAN
					CCNT_DROME
					CCT1_ARATH
					CD2A1_MOUSE
					CDC10_SCHPO
					CDC23_MOUSE
					CDC45_YEAST
					CDCA5_MOUSE
					CDK19_HUMAN
					CDN2C_HUMAN
					CDT1B_ARATH
					CE051_HUMAN
					CEBPA_MOUSE
					CED3_CAEEL
					CENPC_HUMAN
					CENPT_CHICK
					CEP1_CAEEL
					CEP68_HUMAN
					CERU_HUMAN
					CF211_HUMAN
					CFAD_RAT
					CG055_HUMAN
					CGL3_COPCI
					CH076_MOUSE
					CHD7_HUMAN
					CHI37_TRIHA
					CHIT_CAEEL
					CHMU_YEAST
					CI040_HUMAN
					CIA30_ARATH
					CID1_SCHPO
					CION_CIOIN
					CISY1_YEAST
					CK057_HUMAN
					CKR_CONRA
					CLASR_HUMAN
					CLEC_CONCL
					CLP1_ARATH
					CLPR4_ARATH
					CLU_DROME
					CML12_ARATH
					CMTR1_MOUSE
					CNDD3_MOUSE
					CNO11_HUMAN
					CNTRL_HUMAN
					CO6A1_XENLA
					COAD_ARATH
					COI1_ARATH
					COM1_SCHPO
					CONB_CANEN
					COQ7_CAEEL
					COT1_HUMAN
					CP089_HUMAN
					CP74_LINUS
					CPG9_CAEEL
					CPPAS_TANCI
					CPSF5_HUMAN
					CQ096_HUMAN
					CRDL2_HUMAN
					CREG2_HUMAN
					CRF6_ARATH
					CRLF1_MOUSE
					CRS2_MAIZE
					CRYAA_MESAU
					CS043_HUMAN
					CSK2B_ARATH
					CSN1_HUMAN
					CSN5_YEAST
					CSN8_ARATH
					CSRP2_COTJA
					CT194_HUMAN
					CTF18_YEAST
					CTF8_YEAST
					CTK1_YEAST
					CTR9_MOUSE
					CTX_SEPES
					CU213_LOCMI
					CUE5_YEAST
					CUL3_CAEEL
					CUO5_BLACR
					CUTA_CRYPI
					CVP1_PIMHY
					CWC23_YEAST
					CWF20_SCHPO
					CXE1_ACTER
					CYB2_YEAST
					CYK3_YEAST
					CYP95_ARATH
					CYSEP_RICCO
					CYT1_ACTDE
					D1861_ARATH
					DACT2_MOUSE
					DANR_DROME
					DARA_DICDI
					DBF4A_HUMAN
					DBR1_DROME
					DCAF5_HUMAN
					DCE1_ARATH
					DCNL1_HUMAN
					DCPS_CAEEL
					DCTN1_DROME
					DDB1_DROME
					DDX11_HUMAN
					DDX23_HUMAN
					DEDD2_HUMAN
					DEFB5_BOVIN
					DEG15_ARATH
					DEOC_HUMAN
					DESM_PIG
					DGC14_DROME
					DHB1_RAT
					DHR12_HUMAN
					DHYSL_LEIDO
					DIAC_HUMAN
					DIMM_DROME
					DJ1B_ARATH
					DKK3_HUMAN
					DMA2_YEAST
					DMRT2_MOUSE
					DNE1_CHLMO
					DNE1_CHLRE
					DNLI4_HUMAN
					DNS2A_HUMAN
					DNSL3_RAT
					DOHH_LEIDO
					DORS_DROME
					DPB_ARATH
					DPH6_SCHPO
					DPOA_YEAST
					DPOG1_HUMAN
					DPP8_HUMAN
					DPYS_LACK1
					DRG1_ARATH
					DRTS_PLAVI
					DSP4_ARATH
					DTN1_CAEEL
					DUS11_HUMAN
					DUS4_YEAST
					DXO_MOUSE
					DYL4_CHLRE
					DZIP3_HUMAN
					E2FA_ARATH
					EAF3_YEAST
					EB1C_ARATH
					ECHD1_MOUSE
					ECM25_YEAST
					ECSIT_DROME
					EDE1_YEAST
					EF1D2_ARATH
					EFCB_NEPCI
					EFS_MOUSE
					EGR2_HUMAN
					EI2BE_YEAST
					EIF2A_SCHPO
					EIF3D_BOTFB
					EIF3K_HUMAN
					ELBOW_DROME
					ELH1_APLCA
					ELMOA_DICDI
					ELP2_YEAST
					ELYS_XENLA
					EMF2_ARATH
					END4_DICDI
					ENP1_YEAST
					ENPP2_BOVIN
					EPAS1_MOUSE
					EPN1_ARATH
					ERCC8_HUMAN
					ERG_HUMAN
					ES1_HUMAN
					ESF2_YEAST
					ESP4_ZOOVI
					ESTJ_HELVI
					ETUD1_HUMAN
					EX3L1_MOUSE
					EXO70_YEAST
					EXOS4_HUMAN
					F10A1_DROME
					F122A_HUMAN
					F170A_MOUSE
					F199X_HUMAN
					F91A1_HUMAN
					FA60A_HUMAN
					FA7_HUMAN
					FA83H_MOUSE
					FABP2_MANSE
					FAEC_EMENI
					FAM9A_HUMAN
					FAN_HUMAN
					FAR2_CAEEL
					FATA1_ARATH
					FBF2_CAEEL
					FBRL_RAT
					FBX31_HUMAN
					FBXL4_HUMAN
					FCL_HUMAN
					FEL1A_FELCA
					FER_TRIVA
					FETUA_RAT
					FGF21_HUMAN
					FHBB_DICDI
					FIBC_LUMRU
					FIR1_YEAST
					FKB19_ARATH
					FKH2_SCHPO
					FLP11_CAEEL
					FLXL2_ARATH
					FMP46_YEAST
					FND1_PINMG
					FOLB1_ARATH
					FORJ_DICDI
					FOXH1_DANRE
					FOXP4_MOUSE
					FRAT1_HUMAN
					FRMSR_YEAST
					FSIP1_MOUSE
					FTHC_YEAST
					FTZF1_DROME
					FVE_FLAVE
					FYCO1_HUMAN
					G3BP_SCHPO
					GAB3_MOUSE
					GAL80_KLULA
					GAMT_HUMAN
					GAS8_DROME
					GATB_HUMAN
					GBLP_ENCCU
					GCN1_YEAST
					GCR2_ARATH
					GCYDB_DROME
					GDIR1_BOVIN
					GEF1_SCHPO
					GEMI2_DROME
					GET4_HUMAN
					GGNB2_HUMAN
					GIC1_YEAST
					GIMA7_HUMAN
					GKAP1_HUMAN
					GLB1_LIOJA
					GLBL_LAMSP
					GLCTK_MOUSE
					GLGB3_ARATH
					GLNA2_DICDI
					GLRX1_MOUSE
					GLTP_BOVIN
					GLYR1_DROME
					GMPR2_HUMAN
					GNMT_HUMAN
					GOGC6_ARATH
					GP1_SOLLC
					GPDA2_ARATH
					GPS2_HUMAN
					GR1_ARATH
					GRF5_ARATH
					GRN_HUMAN
					GRTP1_HUMAN
					GSDMD_HUMAN
					GST1_DROME
					GSTO2_HUMAN
					GTE10_ARATH
					GTSF1_HUMAN
					GUN3_HUMIN
					GYP1_YEAST
					H1BP3_MOUSE
					H2B_ENCCU
					HAKAI_HUMAN
					HASP_HUMAN
					HBA1_ONCMY
					HBS1_SCHPO
					HCY2A_RAPVE
					HDC_DROME
					HEAT6_HUMAN
					HELLS_HUMAN
					HEM62_ARATH
					HEP2_HUMAN
					HETS_PODAS
					HF101_ARATH
					HGH1_YEAST
					HIF3A_MOUSE
					HIR1_SCHPO
					HIS4_YEAST
					HLJ1_YEAST
					HMEN_DROME
					HMMR_MOUSE
					HNF4_DROME
					HOG1_YEAST
					HORN_HUMAN
					HO_YEAST
					HPPD_ARATH
					HQD2_CANAL
					HRS_DROME
					HSFX1_HUMAN
					HSOP_WHEAT
					HSP7F_SCHPO
					HSPC_ELECI
					HTH_DROME
					HUNB_DROME
					HXA3_MOUSE
					HYAST_HYAAR
					I22R2_HUMAN
					IAAD_HORVU
					IBBR_ORYSJ
					ICAA_ASCSU
					ICI_LUMTE
					ID4_MOUSE
					IDUA_CANFA
					IELA_ASPFU
					IF2A_DICDI
					IF4E2_MOUSE
					IF5_HUMAN
					IFNL2_HUMAN
					IFT74_CHLRE
					IGHA1_GORGO
					IKBL1_HUMAN
					IL13_HUMAN
					IL27A_HUMAN
					IL5_HUMAN
					ILV6_YEAST
					IMB2_YEAST
					IMPA2_MOUSE
					IN35_HUMAN
					INHA_HUMAN
					INP4B_RAT
					INT10_HUMAN
					INVB_DAUCA
					IP5P3_ARATH
					IPMK_YEAST
					IPUA_ASPNG
					IQG1_CANAL
					IRF2_MOUSE
					IRX4_HUMAN
					ISK4_PIG
					ISPF_ARATH
					ITFG2_HUMAN
					ITRY_LEULE
					JAL1_ARATH
					JIL1_DROME
					JMJ25_ARATH
					JZ50B_CHIGU
					K1107_HUMAN
					K1C39_HUMAN
					KAB2_OLDAF
					KAL1L_MOUSE
					KAPR_SCHPO
					KAT7_MOUSE
					KBTBB_MOUSE
					KCD17_HUMAN
					KDM2B_HUMAN
					KEG_ARATH
					KHSE_YEAST
					KICH_YEAST
					KIF3_DICDI
					KIME_YEAST
					KITM_MOUSE
					KLDC2_HUMAN
					KLH11_HUMAN
					KLHL8_HUMAN
					KMT2E_MOUSE
					KPCL_HUMAN
					KR241_HUMAN
					KRI1_YEAST
					KSP1_YEAST
					KU70_SCHPO
					L2GL2_HUMAN
					LACB2_HUMAN
					LALBA_RAT
					LAS1_YEAST
					LBP_RENRE
					LCK_AEDAE
					LCP5_YEAST
					LDL3_ARATH
					LEC1_CAEEL
					LEC4_GRISI
					LECC_POLMI
					LECT_SOLTU
					LEG12_HUMAN
					LEP_HUMAN
					LFY_ARATH
					LHP1_YEAST
					LIGV1_LIGVU
					LIN32_CAEEL
					LIN9_CAEEL
					LIPO_BUFMA
					LIRA3_HUMAN
					LLR1_HUMAN
					LOG_ORYSJ
					LOT6_YEAST
					LPSBP_PERAM
					LRCH3_HUMAN
					LRRK1_HUMAN
					LSD2_DROME
					LSM5_YEAST
					LTBP2_HUMAN
					LUCB_OPLGR
					LV1B_BUTOC
					LYPL1_MOUSE
					LYSA_DICDI
					M2K2_ARATH
					M4K3_MOUSE
					MAAT1_HUMAN
					MAF1_SCHPO
					MAGD4_HUMAN
					MALT1_HUMAN
					MANBA_ASPAC
					MAP6_RAT
					MASU1_HUMAN
					MAX_DROME
					MBF1_YEAST
					MBTR1_CAEEL
					MCE1_CAEEL
					MCM21_KLULA
					MCM7_YEAST
					MCPIB_NERVS
					MD20A_ARATH
					MDHC_YEAST
					MEA1_HUMAN
					MED12_MOUSE
					MED17_ARATH
					MED1_YEAST
					MED24_DROME
					MED29_DROME
					MED6_ARATH
					MEE12_ARATH
					MEI5_YEAST
					MEP20_ASPFL
					MES4_DROME
					MET17_HUMAN
					METC_ARATH
					MEX67_CANAL
					MFR2_SCHPO
					MGP_ARGRE
					MID2_SCHPO
					MINA_HUMAN
					MISP_HUMAN
					MIX23_YEAST
					MKL2_HUMAN
					MLF2_HUMAN
					MLP2_DROME
					MMI1_SCHPO
					MN1_HUMAN
					MOB1_YEAST
					MOD5_HUMAN
					MORC2_HUMAN
					MP2K1_DICDI
					MPH6_MOUSE
					MPND_HUMAN
					MPRIP_HUMAN
					MRE11_ARATH
					MRP10_YEAST
					MSA1_YEAST
					MSH3_YEAST
					MSL1_MOUSE
					MSN2_YEAST
					MSS51_HUMAN
					MTAP_DROME
					MTEF4_HUMAN
					MTL5_HUMAN
					MTO1_YEAST
					MTU1_HUMAN
					MU138_SCHPO
					MU166_SCHPO
					MU167_SCHPO
					MUG1_MOUSE
					MUG60_SCHPO
					MUG87_SCHPO
					MUT7_CAEEL
					MYBC_DICDI
					MYG1_RAT
					MYO2_YEAST
					MYOM2_HUMAN
					MYRIP_MOUSE
					MYS2_DICDI
					MZT1B_ARATH
					NAAA_RAT
					NACAD_HUMAN
					NADK2_ARATH
					NAL12_HUMAN
					NAO_FUSOX
					NAS36_CAEEL
					NB5R2_ARATH
					NC2B_DROME
					NCK5L_HUMAN
					NCS1_COPJA
					NDF2_MOUSE
					NDUA8_HUMAN
					NEBL_HUMAN
					NEK4_HUMAN
					NEMO_DROME
					NEU2_RAT
					NEXN_RAT
					NFKB2_CHICK
					NGAP_HUMAN
					NH2L1_HUMAN
					NHR49_CAEEL
					NILP1_ARATH
					NIPA_HUMAN
					NKX22_MOUSE
					NLTP6_AMBAR
					NMNA3_HUMAN
					NO30_PHAVU
					NOC_DROME
					NOL12_HUMAN
					NOP14_YEAST
					NOR_FUSOX
					NP10_HUMAN
					NPF_AEDAE
					NPM_XENLA
					NPW_RAT
					NR2E3_BOVIN
					NRF5_CAEEL
					NRP1_YEAST
					NRX1_ARATH
					NSE2_YEAST
					NSRP1_HUMAN
					NTC20_YEAST
					NTR2_YEAST
					NU211_SCHPO
					NUCL_MESAU
					NUD23_ARATH
					NUDT9_HUMAN
					NUP43_HUMAN
					NUS1_ASPOR
					NXT1_HUMAN
					OB10_DROME
					OC116_CHICK
					ODAM_HUMAN
					ODPX_YEAST
					OGFR_HUMAN
					OLFM_LITCT
					OLP1_SOLLC
					ONCO_HUMAN
					ORC1_HUMAN
					ORC6_MOUSE
					ORTH2_ARATH
					OSKA_DROME
					OTU1_SCHPO
					OVCH2_XENLA
					OXLA_NEUCR
					P2C21_ARATH
					P34_SOYBN
					PA1B3_BOVIN
					PA2_APIME
					PACA_BOVIN
					PAF15_HUMAN
					PAIP2_HUMAN
					PAL_CAEEL
					PANC_YEAST
					PAP6_ARATH
					PAR1_CAEEL
					PARP9_HUMAN
					PAX8_RAT
					PBP4_YEAST
					PCE_TACTR
					PCID2_HUMAN
					PCNA2_ARATH
					PCY2_DICDI
					PCYOX_HUMAN
					PDC_NEUCR
					PDE6_DICDI
					PDLI2_HUMAN
					PDR1_YEAST
					PDZ11_HUMAN
					PECR_HUMAN
					PEP1_ARATH
					PER1_VOLCA
					PESC_CHLRE
					PFD2_YEAST
					PFM_CHAGB
					PGFRL_HUMAN
					PGPI_RAT
					PGRP1_HUMAN
					PGTB2_MOUSE
					PHF10_HUMAN
					PHKG2_HUMAN
					PHP14_HUMAN
					PHTF1_MOUSE
					PIAA_DICDI
					PIFO_MOUSE
					PIM2_MOUSE
					PISD_CRIGR
					PKH1_YEAST
					PKHM3_MOUSE
					PKSL1_ASPPA
					PLBL1_CAEEL
					PLCZ1_MOUSE
					PLIN5_MOUSE
					PLP2_YEAST
					PLY_ZINVI
					PMI2_ARATH
					PNAA_PRUDU
					PNO_EUGGR
					POC3_YEAST
					POF8_SCHPO
					POLI_HUMAN
					POP6_YEAST
					POZ1_SCHPO
					PP2B2_YEAST
					PP4R2_YEAST
					PPARG_HUMAN
					PPDK1_ARATH
					PPK24_SCHPO
					PPM1H_HUMAN
					PPR1A_HUMAN
					PPS1_YEAST
					PR35B_ARATH
					PRC2A_RAT
					PRDM9_HUMAN
					PRI1_SCHPO
					PROA_YEAST
					PROC_HUMAN
					PROK1_HUMAN
					PRP17_YEAST
					PRP39_DROME
					PRP9_YEAST
					PRR5_HUMAN
					PRSR1_HUMAN
					PRXQ_ORYSI
					PSA5_YEAST
					PSB4_YEAST
					PSD2_YEAST
					PSH1_YEAST
					PSMD5_DROME
					PSMG2_HUMAN
					PSY1_ARATH
					PTE1_YEAST
					PTN11_MOUSE
					PTP3_CHLMO
					PTX4_MOUSE
					PUM1_MOUSE
					PUR7_YEAST
					PUS4_YEAST
					PWD_ARATH
					PYC2_YEAST
					PYRG_DROME
					QRIC2_HUMAN
					RA51B_HUMAN
					RABX5_HUMAN
					RAD23_YEAST
					RAD3_YEAST
					RAD5_SCHPO
					RAEP_YEAST
					RAN1_SCHPO
					RASA2_HUMAN
					RAVR2_HUMAN
					RBE1_CANAL
					RBM14_MOUSE
					RBM44_MOUSE
					RBSK_HUMAN
					RCC2_HUMAN
					RCY1_YEAST
					RDR1_YEAST
					REC27_SCHPO
					REF2_YEAST
					REM1_HUMAN
					RES1_SCHPO
					REXO4_HUMAN
					RFA1_YEAST
					RFESD_HUMAN
					RFX7_HUMAN
					RGA1_SCHPO
					RGI2_YEAST
					RGS16_MOUSE
					RHA2A_ARATH
					RHG28_HUMAN
					RHON1_ARATH
					RIBD_ARATH
					RIG_DROME
					RING1_GOSHI
					RIP9_MAIZE
					RIT1_YEAST
					RK23_SPIOL
					RKM4_YEAST
					RL1D1_HUMAN
					RL28_DROME
					RL37A_TETTS
					RL91_ARATH
					RLGPB_HUMAN
					RM06_YEAST
					RM16_BOVIN
					RM24_DROME
					RM35_HUMAN
					RM41_YEAST
					RM53_HUMAN
					RMI2_HUMAN
					RN141_HUMAN
					RN49_YEAST
					RNE_ARATH
					RNF6_HUMAN
					RNMC_MOMCH
					RNY1_YEAST
					ROG3_YEAST
					RP43_RIFPA
					RPA43_HUMAN
					RPAP3_HUMAN
					RPC4_YEAST
					RPF1_HUMAN
					RPKL1_MOUSE
					RPN7_YEAST
					RPP30_HUMAN
					RR13_SPIOL
					RR5_SPIOL
					RRF2M_YEAST
					RRP12_YEAST
					RRP15_YEAST
					RRP46_YEAST
					RS10_HUMAN
					RS21_CAEEL
					RS4_ENCCU
					RSC7_SCHPO
					RSG1_XENLA
					RSPO4_HUMAN
					RT06_YEAST
					RT10_BOVIN
					RT18C_BOVIN
					RT27_YEAST
					RTC4_YEAST
					RTG1_YEAST
					RTS3_YEAST
					RUD3_YEAST
					RUXF_DROME
					RXT2_YEAST
					S1PBP_HUMAN
					SAC2_HUMAN
					SAGE1_HUMAN
					SAMD9_HUMAN
					SAP61_SCHPO
					SAS10_HUMAN
					SAV1_MOUSE
					SC15B_ARATH
					SCAR_DICDI
					SCE3_BRANA
					SCLT1_HUMAN
					SCP1_LOTGI
					SCRT1_MOUSE
					SCY1_YEAST
					SDHF1_YEAST
					SE1BA_DANRE
					SEC5_SCHPO
					SECR_RAT
					SEM2A_DROME
					SENP5_HUMAN
					SERC_YEAST
					SET1_SCHPO
					SETD7_HUMAN
					SF3B6_HUMAN
					SFL1_CANAL
					SFSWA_HUMAN
					SGF29_YEAST
					SGPL_YEAST
					SGT2_SOYBN
					SHBG_RAT
					SHH1_ARATH
					SHRM_DROME
					SIAL_RAT
					SIK2_MOUSE
					SIN3_YEAST
					SIR3_HUMAN
					SIW14_YEAST
					SKAP2_HUMAN
					SKI23_ARATH
					SKIP8_ARATH
					SKP2A_ARATH
					SLD2_SCHPO
					SLIT_DROME
					SLTM_HUMAN
					SLX4_YEAST
					SMB_ARATH
					SMC4_YEAST
					SMG7_HUMAN
					SMR1_ARATH
					SMTN_HUMAN
					SNAK2_SOLTU
					SNF4_ARATH
					SNPC4_HUMAN
					SNU23_YEAST
					SOCS1_MOUSE
					SOL1_SCHPO
					SOSD1_MOUSE
					SOX3_HUMAN
					SP1_HUMAN
					SPA3F_MOUSE
					SPAT8_HUMAN
					SPB4_YEAST
					SPD2B_HUMAN
					SPERT_MOUSE
					SPH1_YEAST
					SPKA_DICDI
					SPO11_YEAST
					SPP41_YEAST
					SPS1_YEAST
					SPT20_RAT
					SPT51_ARATH
					SPT_ARATH
					SR1IP_HUMAN
					SRC64_DROME
					SRK2A_ARATH
					SRP1_SCHPO
					SRRT_ARATH
					SRTD2_HUMAN
					SSBP3_HUMAN
					SSK1_YEAST
					SSR1_SCHPO
					ST17A_HUMAN
					STAM1_CAEEL
					STATB_DICDI
					STDH_YEAST
					STIL_DROME
					STN1_SCHPO
					STRA8_MOUSE
					STXB4_MOUSE
					SUFU_HUMAN
					SUOX_RAT
					SUVH2_ARATH
					SVKA_DICDI
					SWA_DROME
					SWI3D_ARATH
					SWP12_ENCCU
					SXL_DROME
					SYCP3_RAT
					SYF1_YEAST
					SYIM_YEAST
					SYNCI_MOUSE
					SYRC_YEAST
					SYWM_YEAST
					T2AG_YEAST
					T2FB_YEAST
					TAB3_MOUSE
					TAD2B_DROME
					TAF12_DROME
					TAF2_DROME
					TAF6_ARATH
					TAF8_YEAST
					TAMO_DROME
					TARSH_HUMAN
					TBC13_HUMAN
					TBCC_YEAST
					TBF1_CANAL
					TBRG1_HUMAN
					TCAL1_HUMAN
					TCG1_SCHPO
					TCPD_ENCCU
					TCTP_PLAF7
					TDR12_MOUSE
					TE80_TETTH
					TECT1_MOUSE
					TENN_MOUSE
					TER_EUGGR
					TF2AA_DROME
					TF3C2_HUMAN
					TFB4_YEAST
					TFE2_XENLA
					TGFB1_CHLAE
					THA11_HUMAN
					THEG_HUMAN
					THIO_FUSCU
					THOC2_MOUSE
					THRC_SCHPO
					THYG_BOVIN
					TIF9_ARATH
					TIMP1_RAT
					TIR1_ARATH
					TL16_ARATH
					TLP9_ARATH
					TMOD1_HUMAN
					TNNC1_BALNU
					TOA1_YEAST
					TON2_ARATH
					TOPRS_HUMAN
					TP4AP_HUMAN
					TPA_HUMAN
					TPK1_CAEEL
					TPP1_HUMAN
					TPP_ENCCU
					TPSCM_MENPI
					TR732_YEAST
					TRBID_DROME
					TRF_SARPE
					TRI33_MOUSE
					TRI62_HUMAN
					TRIPC_MOUSE
					TRM5_HUMAN
					TRNT1_MOUSE
					TRR_DROME
					TRXR1_HUMAN
					TSH1_MOUSE
					TSP36_TAESA
					TSYL1_HUMAN
					TTC33_HUMAN
					TTI1_YEAST
					TTLL6_HUMAN
					TUD_DROME
					TWF1_SCHPO
					TX21_PHONI
					TXAM2_ANTMC
					TXK2A_SCOMU
					TXND2_HUMAN
					TXS2B_LIOWA
					TYR1_YEAST
					TYW4_YEAST
					U375A_CAEEL
					U740_DROME
					UB2FA_MOUSE
					UBAP1_HUMAN
					UBD_HUMAN
					UBFL1_MOUSE
					UBP13_HUMAN
					UBP24_ARATH
					UBP3_HUMAN
					UBP6_YEAST
					UBR2_YEAST
					UBX6_YEAST
					UEVLD_HUMAN
					UGPA_BOVIN
					ULK4_HUMAN
					UN112_DROME
					UP1_RAT
					UPTI_PIG
					URK1_YEAST
					USH_DROME
					USP5_LOTGI
					UT14A_HUMAN
					UTP17_YEAST
					UTP8_YEAST
					UXT_HUMAN
					VASOT_HYBBI
					VATH_DICDI
					VEGFD_HUMAN
					VGLL1_MOUSE
					VIK1_YEAST
					VIP_CHICK
					VIT6_OSCTI
					VMO1_HUMAN
					VPR2_PIMHY
					VPS51_HUMAN
					VPS9A_ARATH
					VSX1_HUMAN
					WAP53_HUMAN
					WA_EMENI
					WDR12_HUMAN
					WDR3_HUMAN
					WDR65_HUMAN
					WDR92_HUMAN
					WHI3_YEAST
					WISP1_HUMAN
					WOR3_CANAL
					WRKY1_MAIZE
					WWC3_HUMAN
					XIAP_HUMAN
					XPA_HUMAN
					XPP1_HUMAN
					XRN2_YEAST
					XYNA_PHACH
					Y1322_ARATH
					Y1790_ARATH
					Y2881_DICDI
					Y4449_ARATH
					Y5342_EMENI
					Y5A4_ENCCU
					Y827_ENCCU
					YA22_SCHPO
					YAKA_DICDI
					YAY1_SCHPO
					YB92_YEAST
					YBM6_YEAST
					YBY8_YEAST
					YCE2_YEAST
					YCY0_YEAST
					YD176_YEAST
					YD514_YEAST
					YDU2_SCHPO
					YEH1_SCHPO
					YETS4_HUMAN
					YFJ0_YEAST
					YG1D_YEAST
					YG51_YEAST
					YGRB_SCHPO
					YHI9_YEAST
					YHX7_YEAST
					YIQ1_YEAST
					YJ83_SCHPO
					YJNJ_SCHPO
					YK1D_SCHPO
					YKH7_YEAST
					YL054_YEAST
					YL358_YEAST
					YLB8_CAEEL
					YM24_YEAST
					YMF3_YEAST
					YN042_YEAST
					YN98_SCHPO
					YNS4_YEAST
					YO086_YEAST
					YO385_YEAST
					YOTB_CAEEL
					YP109_YEAST
					YPD1_YEAST
					YQI7_CAEEL
					YSL1_CAEEL
					YZR3_ARATH
					ZBED4_HUMAN
					ZBT40_HUMAN
					ZBTB9_HUMAN
					ZCH18_DANRE
					ZDS1_YEAST
					ZFAN6_RAT
					ZHANG_MOUSE
					ZIP1_SCHPO
					ZMYM3_HUMAN
					ZN217_HUMAN
					ZN358_HUMAN
					ZN462_HUMAN
					ZN579_MOUSE
					ZN653_HUMAN
					ZN787_HUMAN
					ZRG8_YEAST
					ZXDC_HUMAN
