# Supplementary material for: Prediction of endoplasmic reticulum resident proteins using fragmented amino acid composition and support vector machine
Source: PeerJ. 2017 Sep 4;5:e3561. doi: 10.7717/peerj.3561 (PMC5588793; doi:10.7717/peerj.3561)
Supplement: Table S2 [file peerj-05-3561-s002.xlsx]

## Sheet: Errp_id
Protein ID
PDI15_ARATH
P4H13_ARATH
YGWH_SCHPO
HPRT_SCHPO
MDE5_SCHPO
ALG13_SCHPO
YGV7_SCHPO
EST1_MACFA
YJM5_SCHPO
YQJ7_SCHPO
NUP_SCHPO
UCP10_SCHPO
YBJ7_SCHPO
TORS_DROME
PKSC_ARATH
SPJ1_SCHPO
MNL1_SCHPO
ALG13_CRYNB
GLU2B_USTMA
PDIA4_CAEEL
SLI1_YEAST
LHS1_SCHPO
ITPK2_ORYSJ
PDI1_CAEEL
FCSB_DICDI
ENPL1_CAEEL
PDIA3_CHLAE
ALG13_ASPFU
HS219_ORYSJ
PDI2_DICDI
BIP1_DICDI
ALG13_CANAL
NBAS_DANRE
ALG13_DEBHA
SIL1_DEBHA
ALG13_YARLI
SIL1_KLULA
LHS1_CANGA
SIL1_CANGA
ALG13_CANGA
SELM_XENLA
GT252_MOUSE
SIL1_ASHGO
HS232_ORYSJ
ZYS3_CHLRE
P4H12_ARATH
P4H7_ARATH
CYP23_ARATH
PDI13_ARATH
ERP38_NEUCR
FACR3_ARATH
NPL4_ORYSJ
YKM7_SCHPO
PSL4_ARATH
YHLB_SCHPO
PCS1L_ARATH
MSRB3_ARATH
PDI22_ARATH
ADG1_SCHPO
CEP3_ARATH
P4H11_ARATH
GLU2A_SCHPO
SIL1_DROME
LACS2_ARATH
YGJ3_SCHPO
